# Supplementary material for: Enhancing characterization of organic nitrogen components in aerosols and droplets using high-resolution aerosol mass spectrometry
Source: Copernicus journal article supplement (doi:10.5194/amt-17-423-2024), 2024-01-22
Supplement: Supplementary file 1 [file amt-17-423-2024-supplement.pdf]

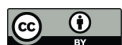

*Supplement of*

## **Enhancing characterization of organic nitrogen components in aerosols and droplets using high-resolution aerosol mass spectrometry**

**Xinlei Ge et al.**

*Correspondence to:* Qi Zhang ([dkwzhang@ucdavis.edu](mailto:dkwzhang@ucdavis.edu))

The copyright of individual parts of the supplement might differ from the article licence.

Table S1. List of N-containing organic (ON) standards analyzed in this study.

| No. | Name                                 | Abbr. | Functional Groups | Chemical Formula                                        | Molecular weight      | Structure                                                                             |
|-----|--------------------------------------|-------|-------------------|---------------------------------------------------------|-----------------------|---------------------------------------------------------------------------------------|
| 1   | Methylamine<br>(Hydrochloride)       | MA    | Amine             | CH <sub>5</sub> N<br>(HCl)                              | 31.0571<br>(36.4610)  | 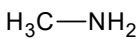   |
| 2   | Dimethylamine<br>(Hydrochloride)     | DMA   | Amine             | C <sub>2</sub> H <sub>7</sub> N<br>(HCl)                | 45.0837<br>(36.4610)  |    |
| 3   | Trimethylamine<br>(Hydrochloride)    | TMA   | Amine             | C <sub>3</sub> H <sub>9</sub> N<br>(HCl)                | 59.1103<br>(36.4610)  |    |
| 4   | Ethylamine<br>(Hydrochloride)        | EA    | Amine             | C <sub>2</sub> H <sub>7</sub> N<br>(HCl)                | 45.0837<br>(36.4610)  |    |
| 5   | Diethylamine<br>(Hydrochloride)      | DEA   | Amine             | C <sub>4</sub> H <sub>11</sub> N<br>(HCl)               | 73.1368<br>(36.4610)  |    |
| 6   | Triethylamine<br>(Hydrochloride)     | TEA   | Amine             | C <sub>6</sub> H <sub>15</sub> N<br>(HCl)               | 101.1900<br>(36.4610) |    |
| 7   | Isopropylamine<br>(Hydrochloride)    | iPPA  | Amine             | C <sub>3</sub> H <sub>9</sub> N<br>(HCl)                | 59.11<br>(36.4610)    |   |
| 8   | Butylamine<br>(Hydrochloride)        | BTA   | Amine             | C <sub>4</sub> H <sub>11</sub> N<br>(HCl)               | 73.14<br>(36.4610)    |  |
| 9   | Isobutylamine<br>(Hydrochloride)     | iBTA  | Amine             | C <sub>4</sub> H <sub>11</sub> N<br>(HCl)               | 73.14<br>(36.4610)    |  |
| 10  | 1,4-Diaminobutane<br>(Hydrochloride) | BDA   | Amine             | C <sub>4</sub> H <sub>12</sub> N <sub>2</sub><br>(2HCl) | 88.15<br>(72.9220)    |  |
| 11  | Pentylamine<br>(Hydrochloride)       | PTA   | Amine             | C <sub>5</sub> H <sub>13</sub> N<br>(HCl)               | 87.16<br>(36.4610)    |  |
| 12  | Tributylamine<br>(Hydrochloride)     | TBA   | Amine             | C <sub>12</sub> H <sub>27</sub> N<br>(HCl)              | 185.3495<br>(36.4610) |  |

|    |                                                                  |       |       |                          |                       |                                                                                       |
|----|------------------------------------------------------------------|-------|-------|--------------------------|-----------------------|---------------------------------------------------------------------------------------|
| 13 | Tri-n-amyliamie<br>(Hydrochloride)                               | TAA   | Amine | $C_{15}H_{33}N$<br>(HCl) | 227.4292<br>(36.4610) | 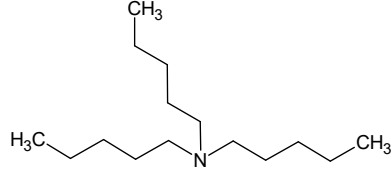   |
| 14 | Piperazine<br>(Dihydrochloride)                                  | PIP   | Amine | $C_4H_{10}N_2$<br>(2HCl) | 86.1356<br>(72.9220)  |    |
| 15 | 1-(3-Dimethylaminopropyl)-3-ethylcarbodiimide<br>(Hydrochloride) | DMPED | Amine | $C_8H_{17}N_3$<br>(HCl)  | 155.2407<br>(36.4610) |    |
| 16 | Hexamethonium chloride                                           | HM    | Amine | $C_{12}H_{30}N_2(Cl_2)$  | 202.3800<br>(70.9060) |    |
| 17 | Benzylamine<br>(Hydrochloride)                                   | BZA   | Amine | $C_7H_9N$<br>(HCl)       | 107.1531<br>(36.4610) |    |
| 18 | Benzamidine<br>(Hydrochloride)                                   | BZD   | Amine | $C_7H_8N_2$ (HCl)        | 120.1518<br>(36.4610) |  |
| 19 | 1,3-phenylenediamine<br>(Dihydrochloride)                        | PHLDA | Amine | $C_6H_8N_2$ (2HCl)       | 108.1411<br>(72.9220) |  |
| 20 | Ethanolamine<br>Also tried MEA.HCl                               | EAOH  | Amine | $C_2H_7NO$               | 61.0831               |  |
| 21 | Diethanolamine<br>(Hydrochloride)                                | DEAOH | Amine | $C_4H_{11}NO_2$<br>(HCl) | 105.1356<br>(36.4610) |  |
| 22 | Triethanolamine                                                  | TEAOH | Amine | $C_6H_{15}NO_3$          | 149.1882              |  |
| 23 | Methyldiethanolamine<br>(Hydrochloride)                          | MDEA  | Amine | $C_5H_{13}NO_2$<br>(HCl) | 119.1622<br>(36.4610) |  |
| 24 | 2-Amino-2-methyl-1-propanol<br>(Hydrochloride)                   | AMP   | Amine | $C_4H_{11}NO$<br>(HCl)   | 89.1362<br>(36.4610)  |  |

|    |                                   |       |       |                      |                       |  |
|----|-----------------------------------|-------|-------|----------------------|-----------------------|--|
| 25 | Bis(2-hydroxypropyl)amine         | BOHA  | Amine | $C_6H_{15}NO_2$      | 133.1888              |  |
| 26 | 4-Aminophenol (Hydrochloride)     | APA   | Amine | $C_6H_7NO$<br>(HCl)  | 109.1259<br>(36.4610) |  |
| 27 | Ethylene diamine tetraacetic acid | EDTA  | Amine | $C_{10}H_{16}N_2O_8$ | 292.2426              |  |
| 28 | Urea                              | UREA  | Amide | $CH_4N_2O$           | 60.0553               |  |
| 29 | Benzamide                         | BZAM  | Amide | $C_7H_7NO$           | 121.1366              |  |
| 30 | N,N'-Methylenebisacrylamide       | NMAM  | Amide | $C_7H_{10}N_2O_2$    | 154.1665              |  |
| 31 | Nicotinamide                      | NCAM  | Amide | $C_6H_6N_2O$         | 122.1246              |  |
| 32 | Pyrazinecarboxamide               | PRCAM | Amide | $C_5H_5N_3O$         | 123.1127              |  |
| 33 | Acetaminophenol                   | AAP   | Amide | $C_8H_9NO_2$         | 151.1626              |  |

|    |                             |       |            |                 |          |                                                                                       |
|----|-----------------------------|-------|------------|-----------------|----------|---------------------------------------------------------------------------------------|
| 34 | Glycine                     | GLY   | Amino Acid | $C_2H_5NO_2$    | 75.0666  | 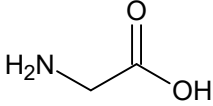   |
| 35 | L-Alanine                   | ALA   | Amino Acid | $C_3H_7NO_2$    | 89.0932  |    |
| 36 | $\gamma$ -Aminobutyric acid | GABA  | Amino Acid | $C_4H_9NO_2$    | 103.1198 |    |
| 37 | R-2-aminobutyric acid       | RGABA | Amino Acid | $C_4H_9NO_2$    | 103.1198 |    |
| 38 | L-Serine                    | SER   | Amino Acid | $C_3H_7NO_3$    | 105.0926 |    |
| 39 | L-Proline                   | PRO   | Amino Acid | $C_5H_9NO_2$    | 115.1305 |  |
| 40 | L-Valine                    | VAL   | Amino Acid | $C_5H_{11}NO_2$ | 117.1463 |  |
| 41 | L-Threonine                 | THR   | Amino Acid | $C_4H_9NO_3$    | 119.1192 |  |
| 42 | L-Cysteine                  | CYS   | Amino Acid | $C_3H_7NO_2S$   | 121.1580 |  |

|    |                                |       |            |                            |                       |                                                                                       |
|----|--------------------------------|-------|------------|----------------------------|-----------------------|---------------------------------------------------------------------------------------|
| 43 | L-Isoleucine                   | ILE   | Amino Acid | $C_6H_{13}NO_2$            | 131.1729              | 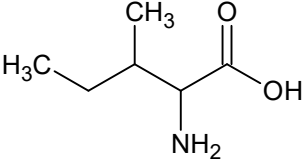   |
| 44 | L-Leucine                      | LEU   | Amino Acid | $C_6H_{13}NO_2$            | 131.1729              |    |
| 45 | trans-4-hydroxyl-proline       | PROOH | Amino Acid | $C_5H_9NO_3$               | 131.1299              |    |
| 46 | L-Asparagine                   | ASN   | Amino Acid | $C_4H_8N_2O_3$             | 132.1179              |    |
| 47 | L-Ornithine<br>(Hydrochloride) | ORN   | Amino Acid | $C_5H_{12}N_2O_2$<br>(HCl) | 132.1610<br>(34.4610) |   |
| 48 | L-Aspartic Acid                | ASP   | Amino Acid | $C_4H_7NO_4$               | 133.1027              |  |
| 49 | L-Glutamine                    | GLN   | Amino Acid | $C_5H_{10}N_2O_3$          | 146.1445              |  |
| 50 | L-Lysine                       | LYS   | Amino Acid | $C_6H_{14}N_2O_2$          | 146.1876              |  |
| 51 | L-Glutamic Acid                | GLU   | Amino Acid | $C_5H_9NO_4$               | 147.1293              |  |

|    |                                               |       |                     |                                          |                              |  |
|----|-----------------------------------------------|-------|---------------------|------------------------------------------|------------------------------|--|
| 52 | L-Methionine                                  | MET   | Amino Acid          | $C_5H_{11}NO_2S$                         | 149.2110                     |  |
| 53 | L-Histidine<br>(Monochloride.<br>Monohydrate) | HIS   | Amino Acid          | $C_6H_9N_3O_2$<br>(HCl·H <sub>2</sub> O) | 155.1546<br>(36.4610+18.013) |  |
| 54 | L-Methionine Sulfoxide                        | METSO | Amino Acid          | $C_5H_{11}NO_3S$                         | 165.2110                     |  |
| 55 | L-Phenylalanine                               | PHE   | Amino Acid          | $C_9H_{11}NO_2$                          | 165.1891                     |  |
| 56 | L-Arginine<br>(Hydrochloride)                 | ARG   | Amino Acid          | $C_6H_{14}N_4O_2$<br>(HCl)               | 174.2010<br>(36.4610)        |  |
| 57 | L-Tyrosine                                    | TYR   | Amino Acid          | $C_9H_{11}NO_3$                          | 181.1885                     |  |
| 58 | L-Tryptophan                                  | TRP   | Amino Acid          | $C_{11}H_{12}N_2O_2$                     | 204.2252                     |  |
| 59 | 4-Aminobenzoic acid                           | ABA   | Amino acid          | $C_7H_7NO_2$                             | 137.1360                     |  |
| 60 | 4-Nitroimidazole                              | NID   | Nitro-<br>compounds | $C_3H_3N_3O_2$                           | 113.0748                     |  |

|    |                           |      |                 |              |          |                                                                                       |
|----|---------------------------|------|-----------------|--------------|----------|---------------------------------------------------------------------------------------|
| 61 | 4-Nitrophenol             | NPH  | Nitro-compounds | $C_6H_5NO_3$ | 139.1088 | 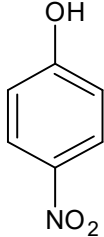   |
| 62 | 2-Nitrobenzaldehyde       | NBAD | Nitro-compounds | $C_7H_5NO_3$ | 151.1195 |    |
| 63 | 2-nitrobenzyl alcohol     | NBAC | Nitro-compounds | $C_7H_7NO_3$ | 153.1354 |    |
| 64 | Pyrazole                  | PRZ  | N-heterocycle   | $C_3H_4N_2$  | 68.0773  |    |
| 65 | Imidazole                 | ID   | N-heterocycle   | $C_3H_4N_2$  | 68.0773  |  |
| 66 | Pyrrole-2-carboxylic acid | PRCA | N-heterocycle   | $C_5H_5NO_2$ | 111.0987 |  |
| 67 | 2-Picolinic acid          | PCA  | N-heterocycle   | $C_6H_5NO_2$ | 123.1094 |  |
| 68 | Nicotinic acid            | NCA  | N-heterocycle   | $C_6H_5NO_2$ | 123.1094 |  |



|    |                          |         |                 |                                                           |                    |                                                                                     |
|----|--------------------------|---------|-----------------|-----------------------------------------------------------|--------------------|-------------------------------------------------------------------------------------|
| 69 | Indole-3-carboxylic acid | IDCA    | N-heterocycle   | C <sub>9</sub> H <sub>7</sub> NO <sub>2</sub>             | 161.1574           | 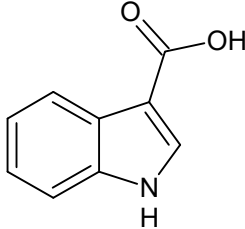 |
| 70 | Thiamine (hydrochloride) | THA     | N-heterocycle   | C <sub>12</sub> H <sub>17</sub> ClN <sub>4</sub> OS (HCl) | 300.8076 (36.4610) |  |
| 71 | Amino acid standard      | AS      | Amino Acid      | -                                                         | -                  | Physiological acidics and neutrals                                                  |
| 72 | Protein                  | PROTEIN | Protein         | -                                                         | -                  | Cytochrome C from horse heart                                                       |
| 73 | Elliott Soil             | HA      | Humic substance | -                                                         | -                  | Standard HA from IHSS*, No. 1S102H                                                  |
| 74 | Waskish Peat             | FA      | Humic substance | -                                                         | -                  | Reference HA from IHSS, No. 1R107F                                                  |
| 75 | Suwannee River           | NOM     | Humic substance | -                                                         | -                  | Aquatic NOM (Natural Organic Matter) from IHSS, No. 1R101N                          |

\*International Humic Substances Society (<http://www.ihss.gatech.edu/>).

Table S2. List of the N-containing organic (ON) standards used to make the 1:1 (mass ratio) mixtures with sulfate (in ammonium sulfate).

| No.      | ID.<br>in Table S1 | Name                                      | No.       | ID.<br>in Table S1 | Name                                    |
|----------|--------------------|-------------------------------------------|-----------|--------------------|-----------------------------------------|
| <b>1</b> | 1                  | Methylamine<br>(Hydrochloride)            | <b>10</b> | 34                 | Glycine                                 |
| <b>2</b> | 2                  | Dimethylamine<br>(Hydrochloride)          | <b>11</b> | 35                 | L-Alanine                               |
| <b>3</b> | 3                  | Trimethylamine<br>(Hydrochloride)         | <b>12</b> | 39                 | L-Proline                               |
| <b>4</b> | 4                  | Ethylamine<br>(Hydrochloride)             | <b>13</b> | 41                 | L-Threonine                             |
| <b>5</b> | 5                  | Diethylamine<br>(Hydrochloride)           | <b>14</b> | 42                 | L-Cysteine<br>(Hydrochloride)           |
| <b>6</b> | 6                  | Triethylamine<br>(Hydrochloride)          | <b>15</b> | 59                 | 4-Aminobenzonic<br>acid                 |
| <b>7</b> | 20                 | Ethanolamine<br>(Hydrochloride)           | <b>16</b> | 68                 | Nicotinic acid                          |
| <b>8</b> | 19                 | 1,3-phenylenediamine<br>(Dihydrochloride) | <b>17</b> | 23                 | Methyldiethanolamine<br>(Hydrochloride) |
| <b>9</b> | 33                 | Acetaminophenol                           | <b>18</b> | 14                 | Piperazine<br>(Dihydrochloride)         |

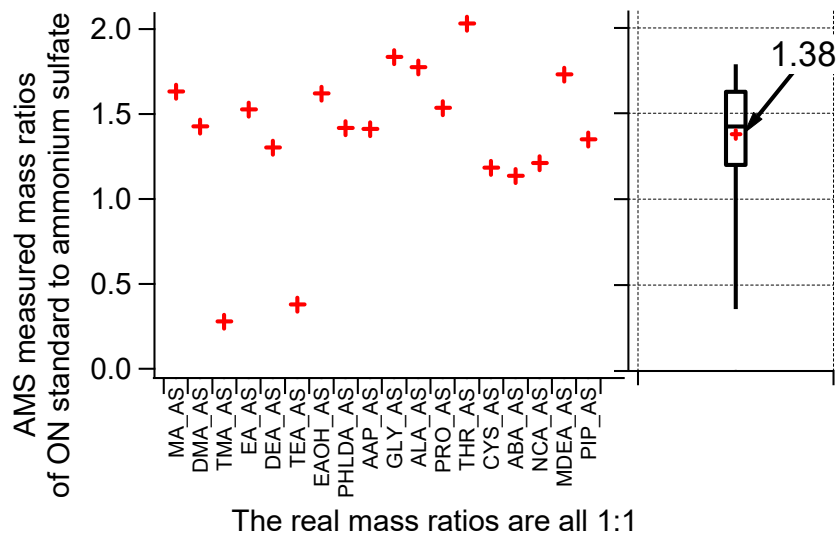

Figure S1. AMS measured mass ratios of the mixtures of different ON standards with ammonium sulfate. All mass ratios of the mixtures are prepared in 1:1 (the whiskers above and below the boxes indicate the 90<sup>th</sup> and 10<sup>th</sup> percentiles, the upper and lower boundaries of the boxes indicate the 75<sup>th</sup> and 25<sup>th</sup> percentiles, and the lines in the boxes indicate the median values and the cross symbols indicate the mean values).

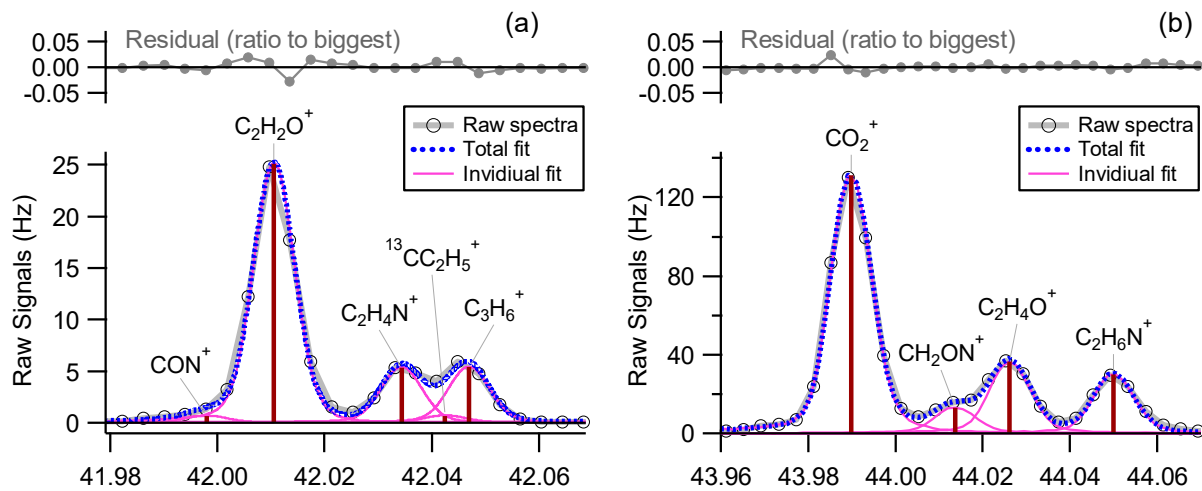

Figure S2. Examples of high resolution mass spectral analysis of (a)  $m/z$  42 and (b)  $m/z$  44.

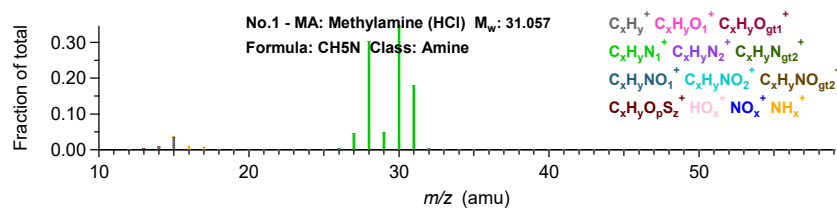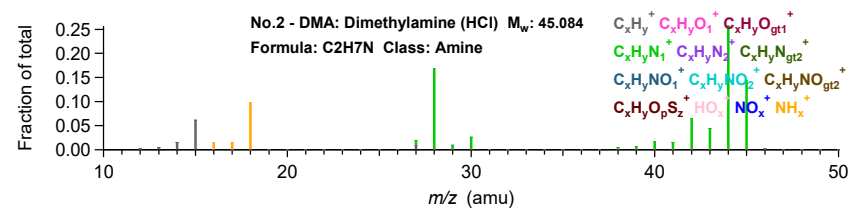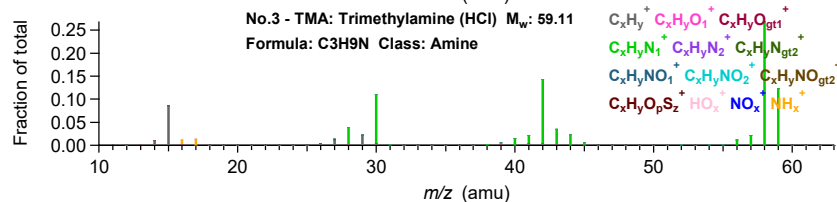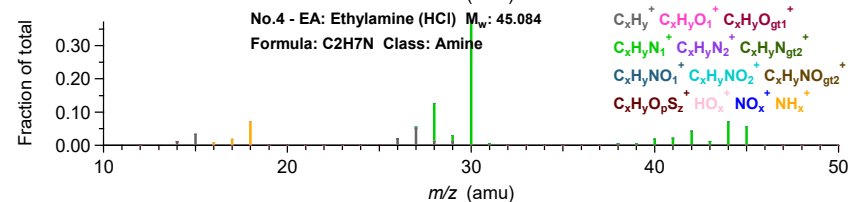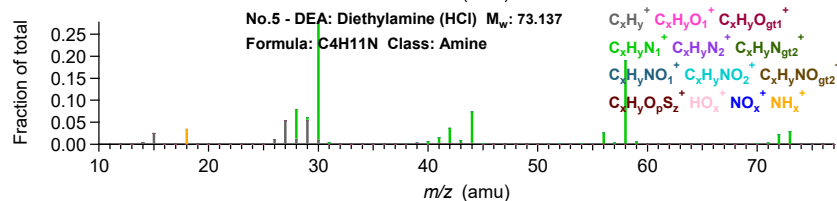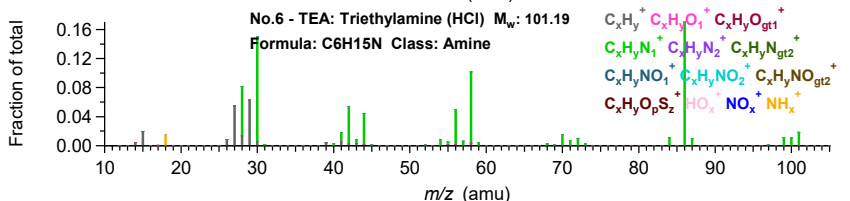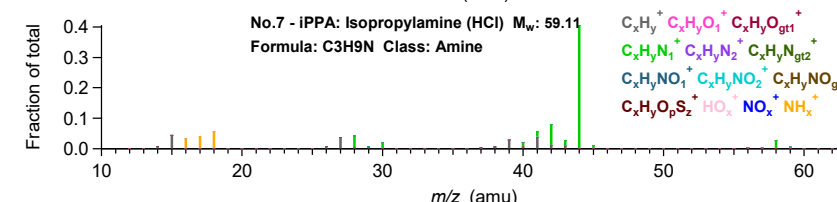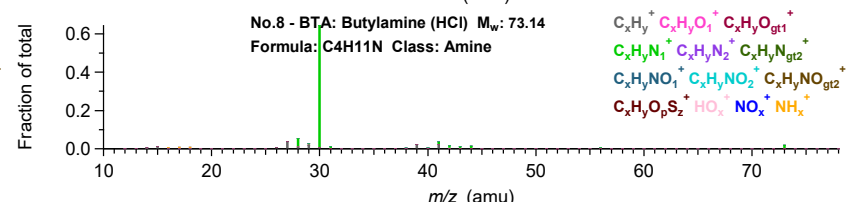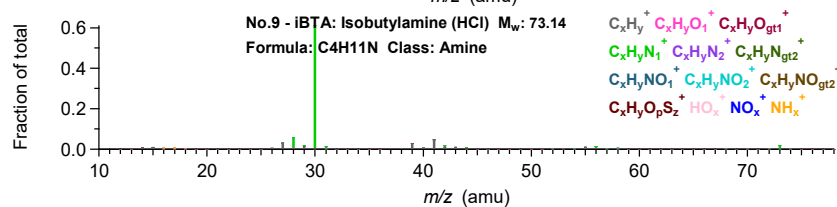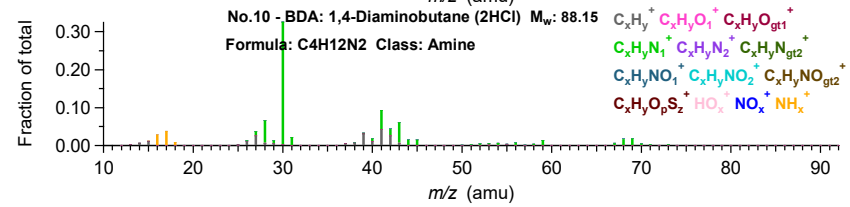

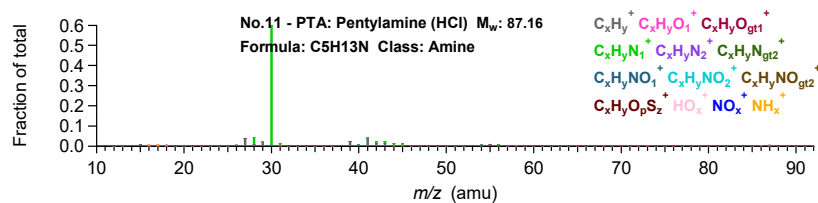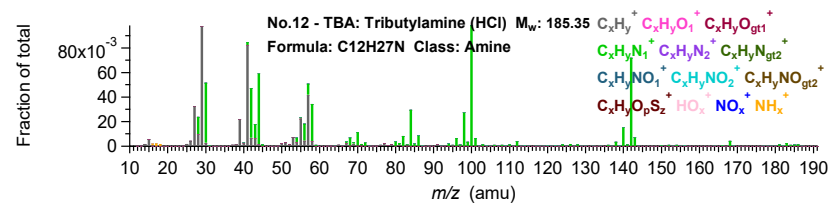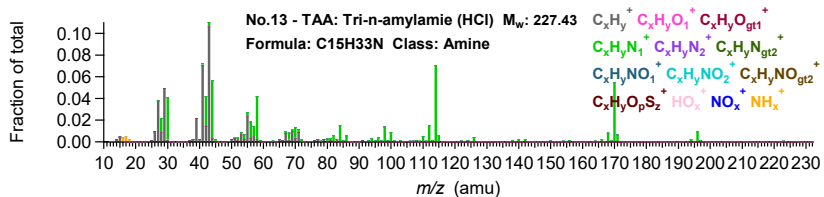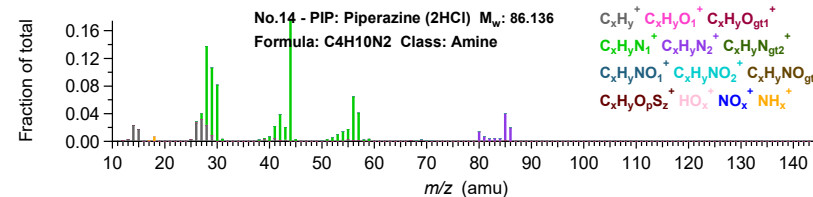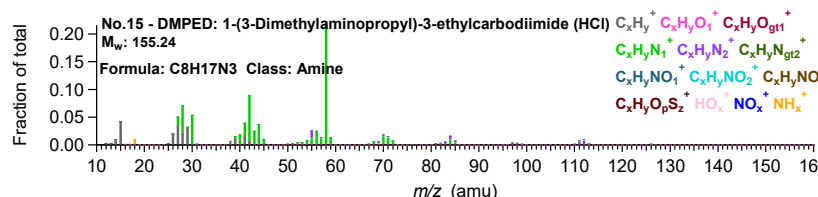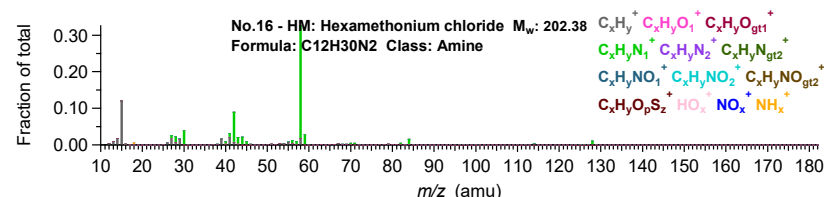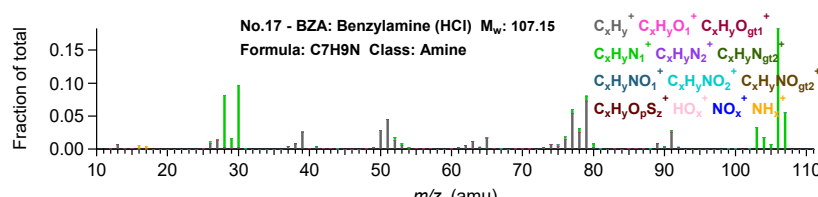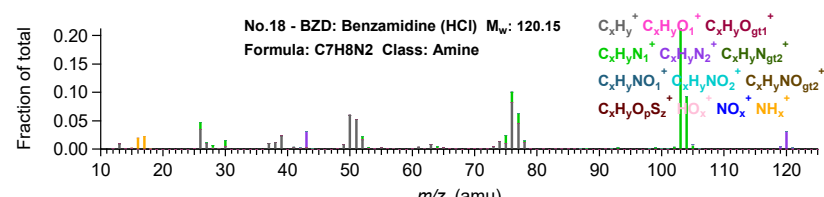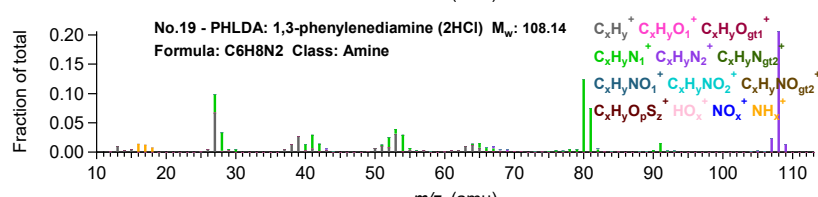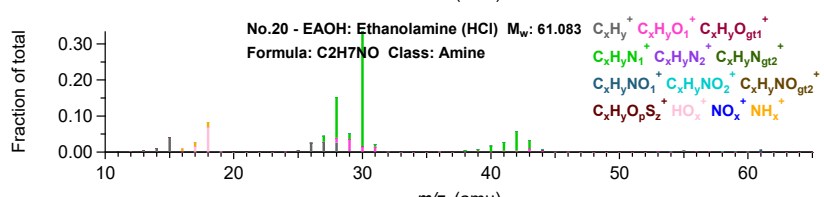

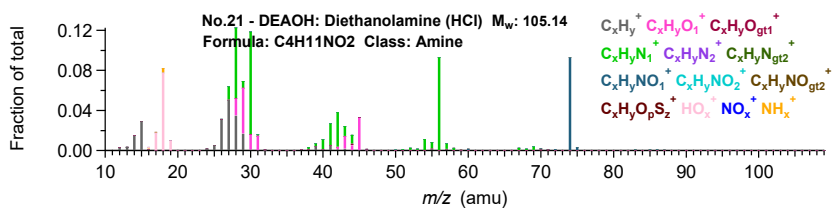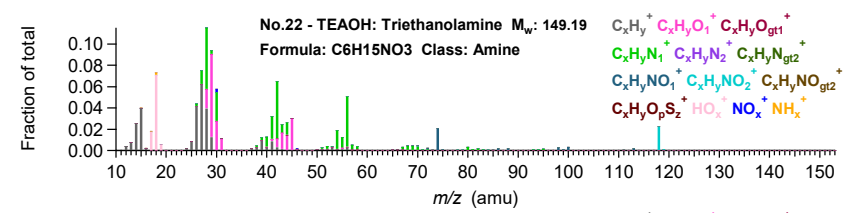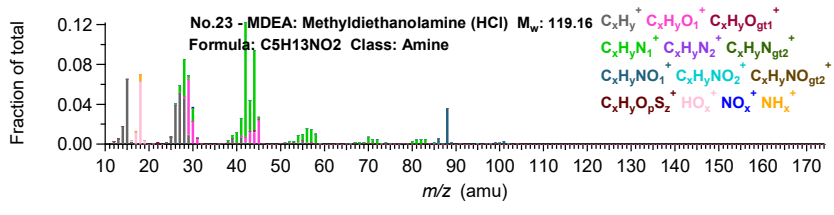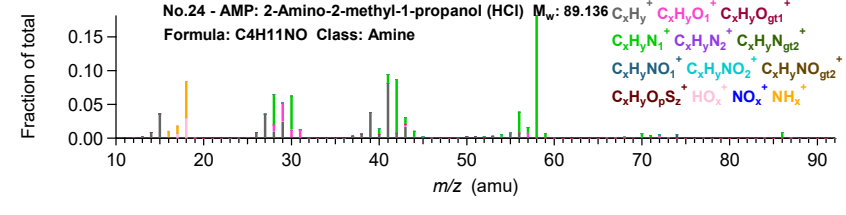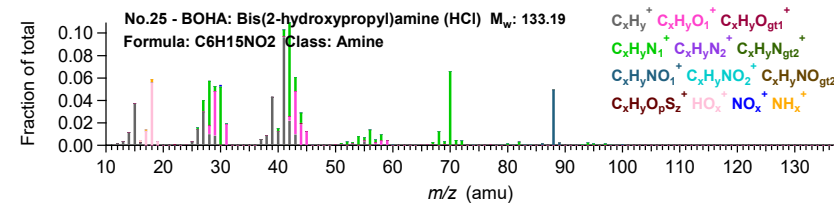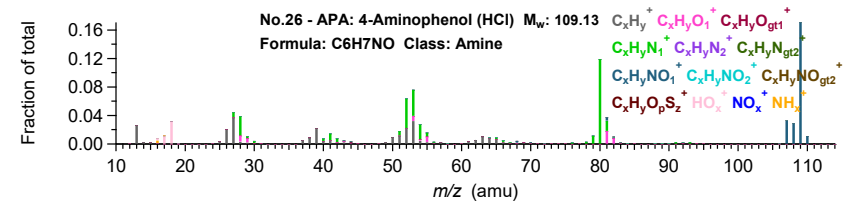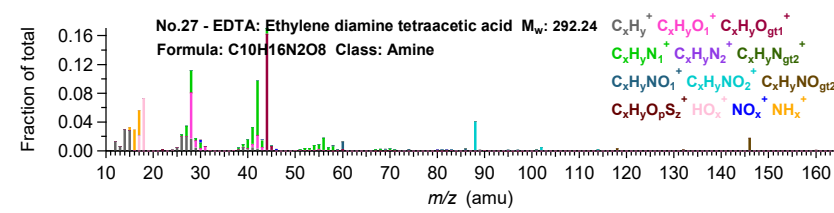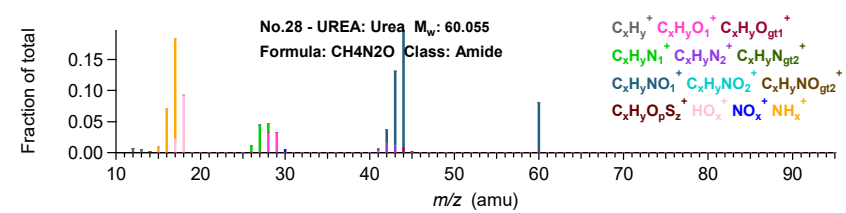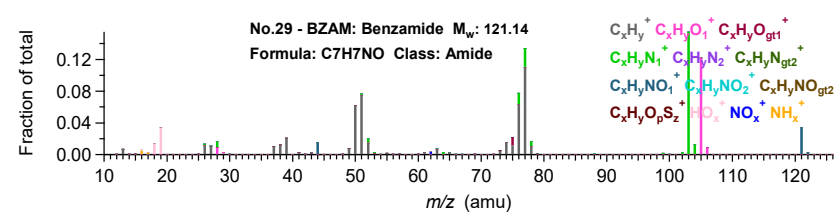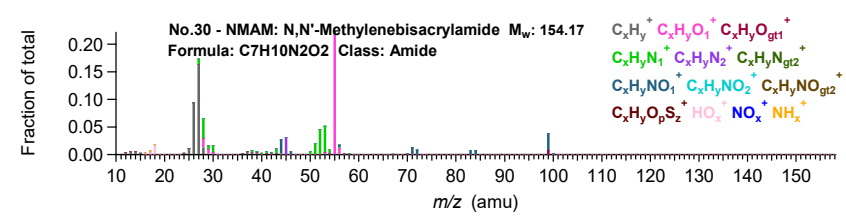

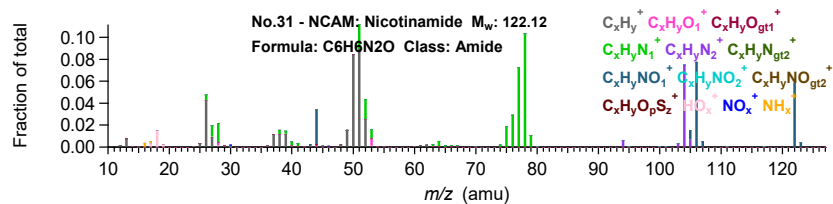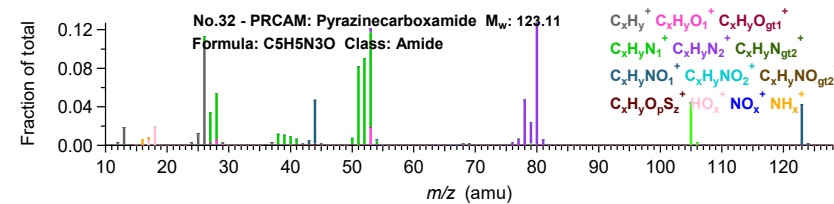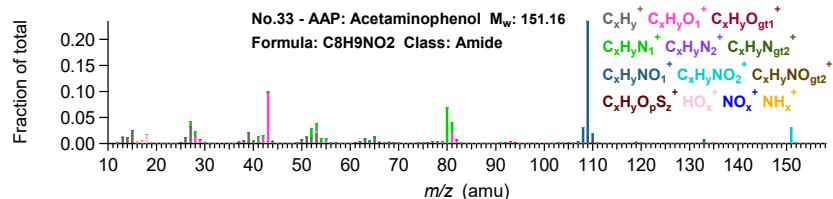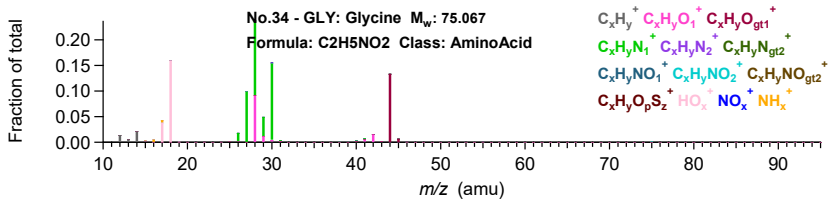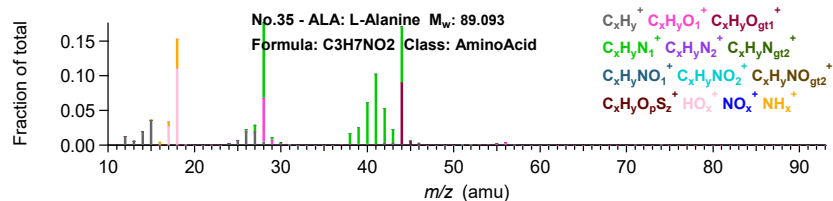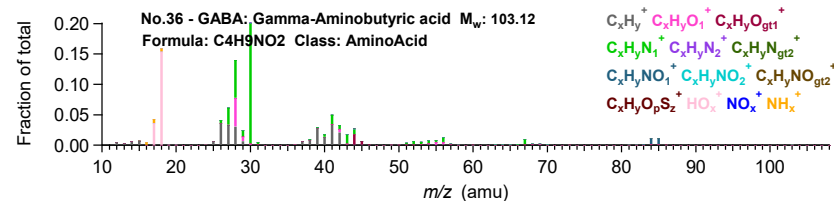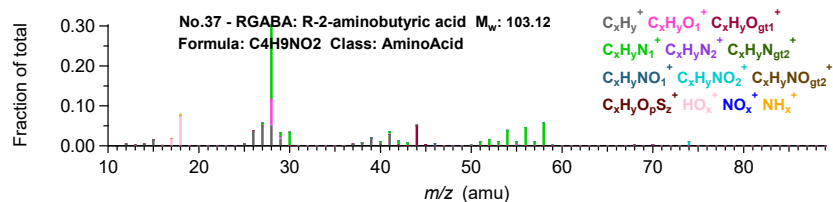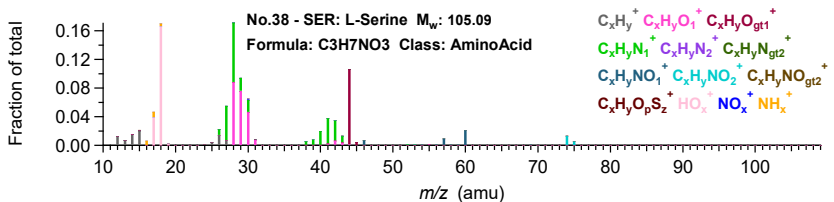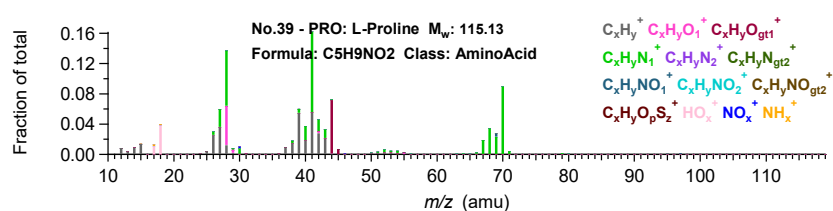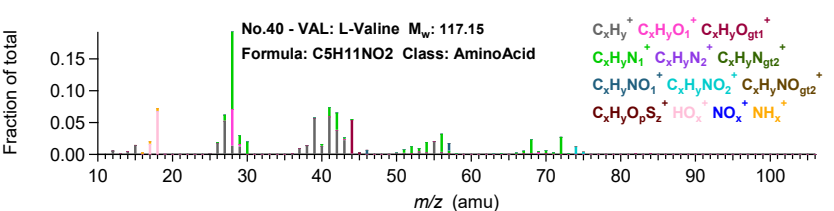



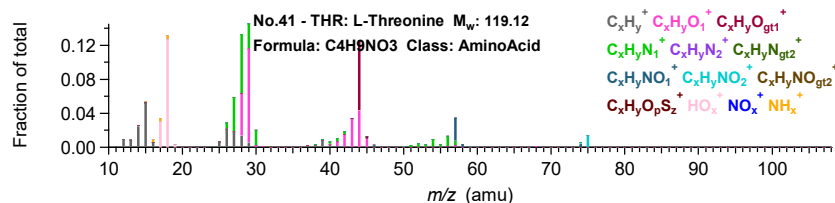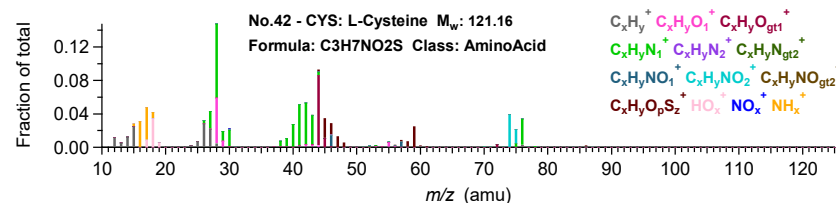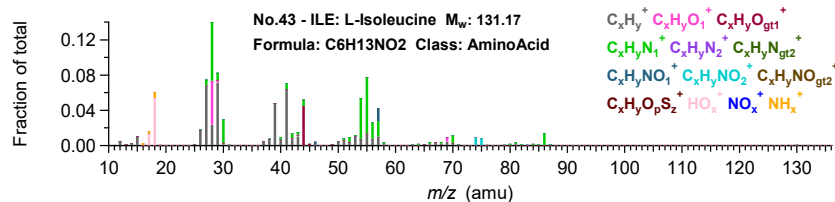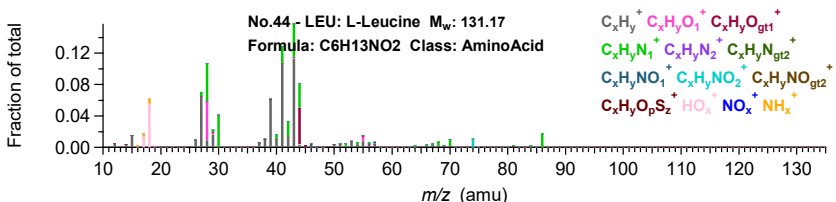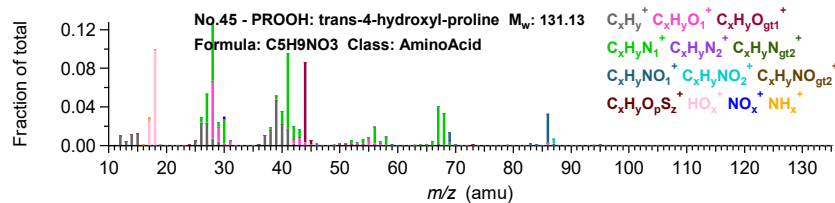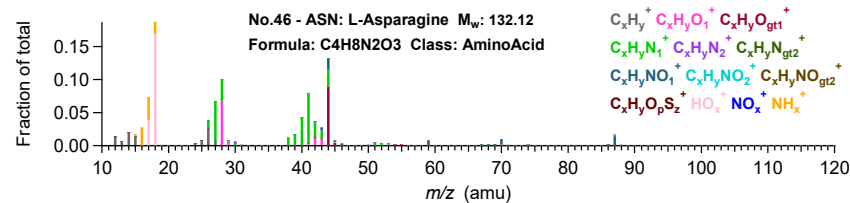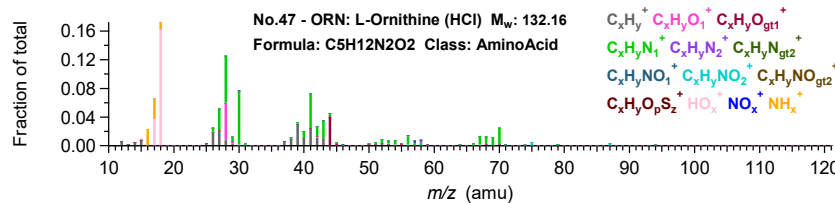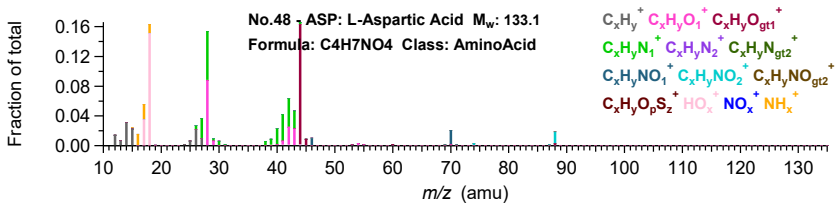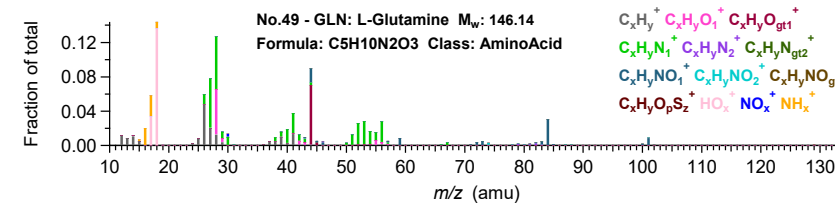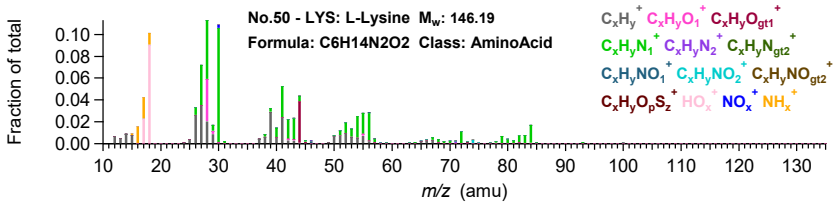

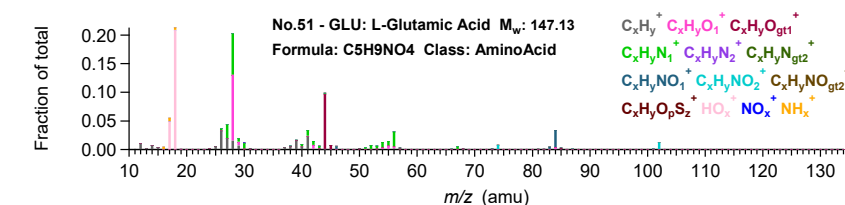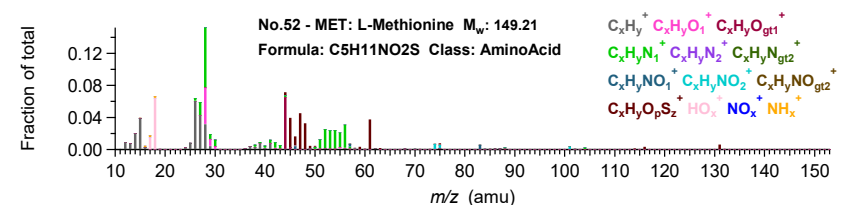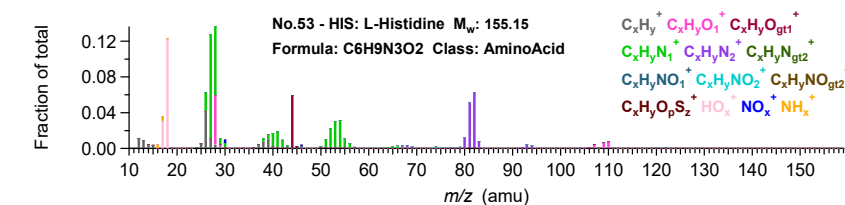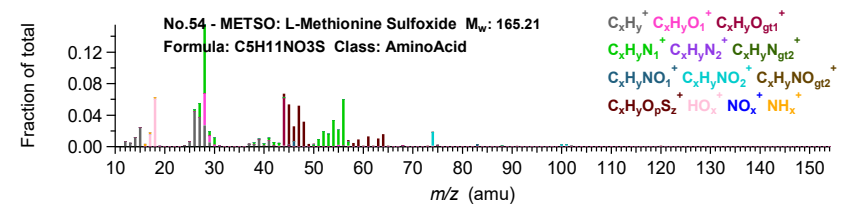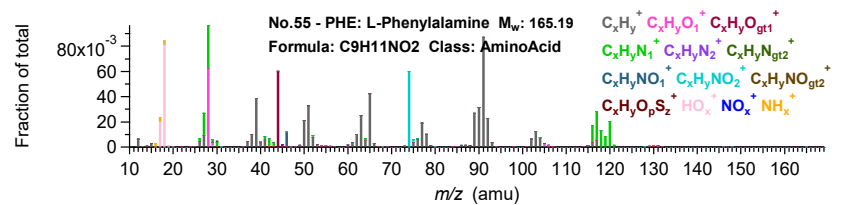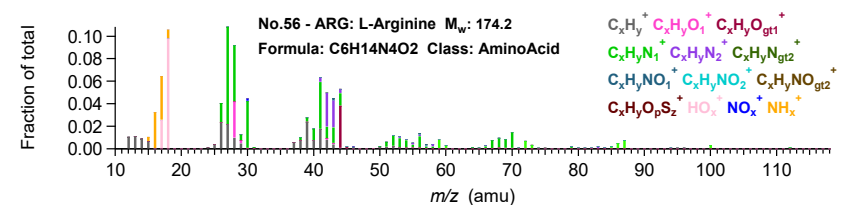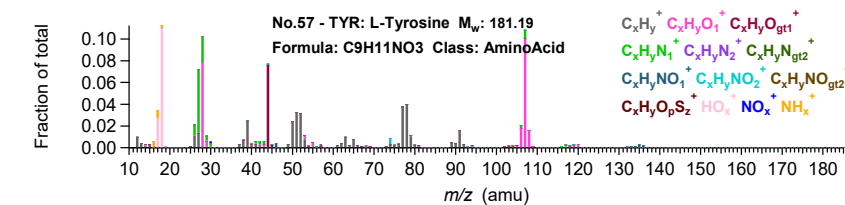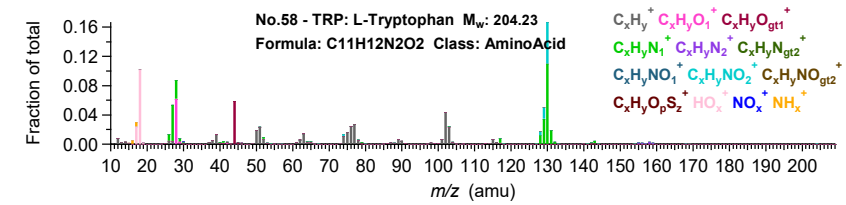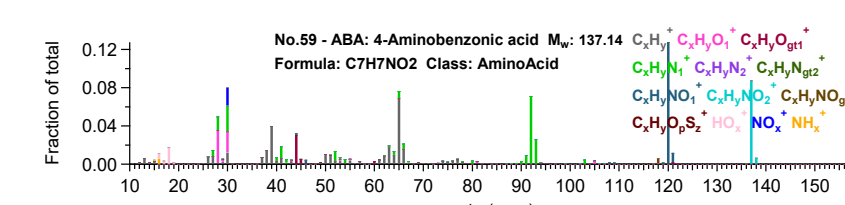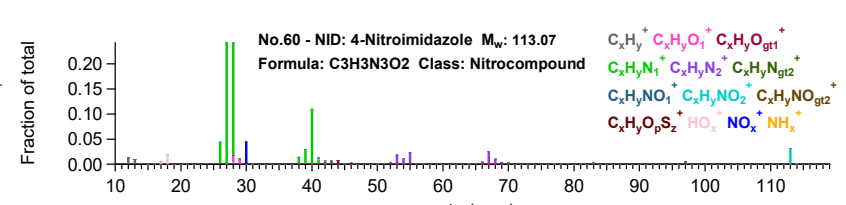

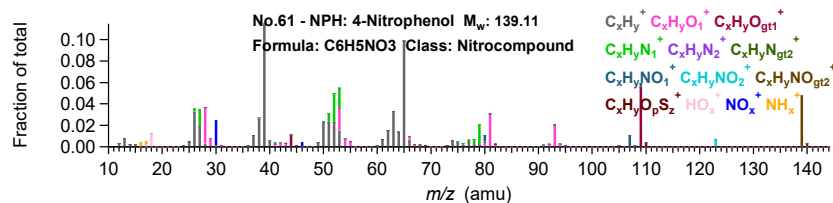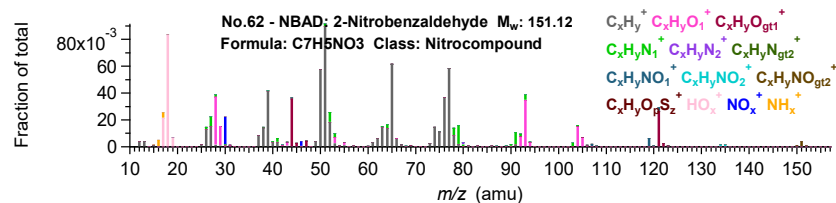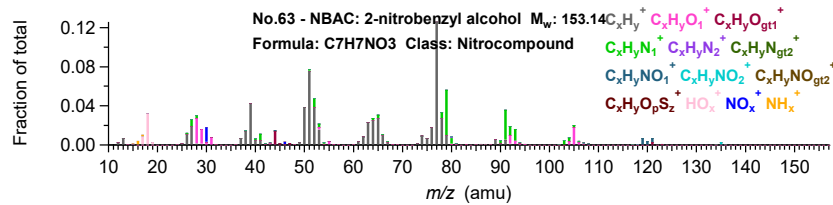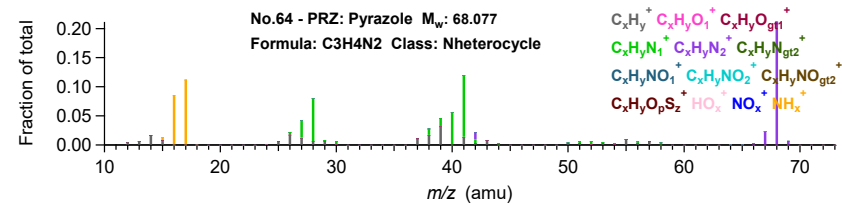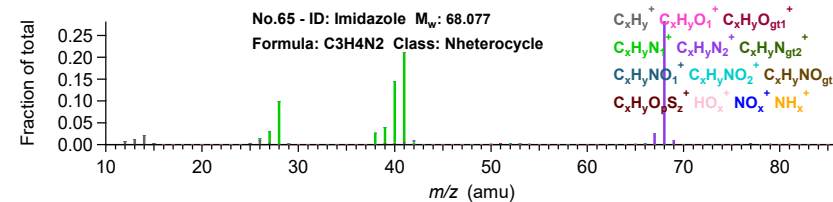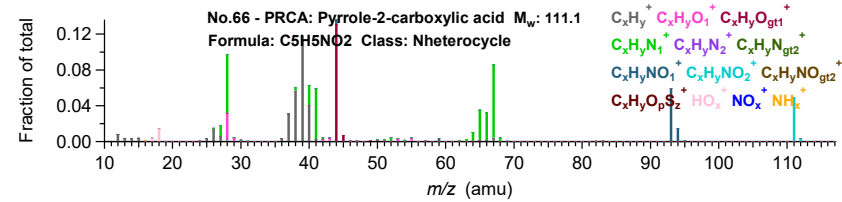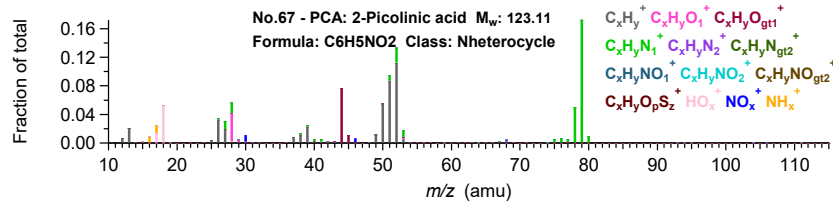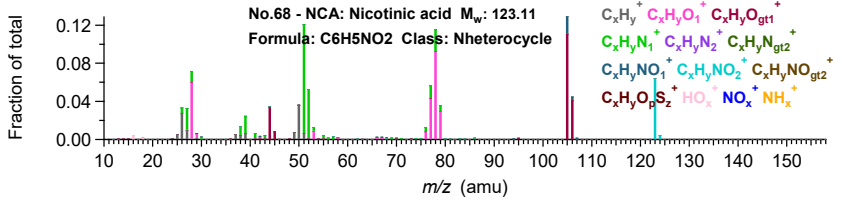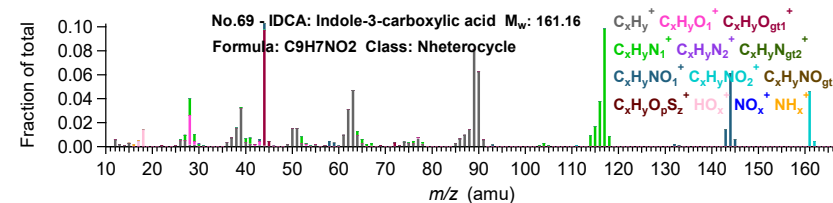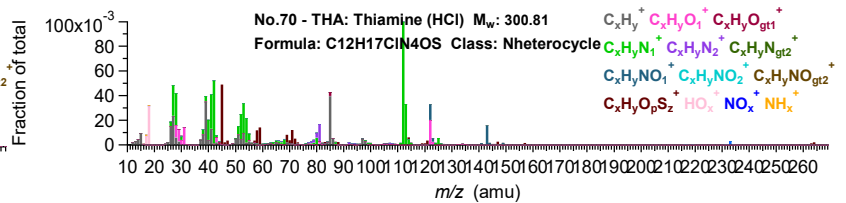

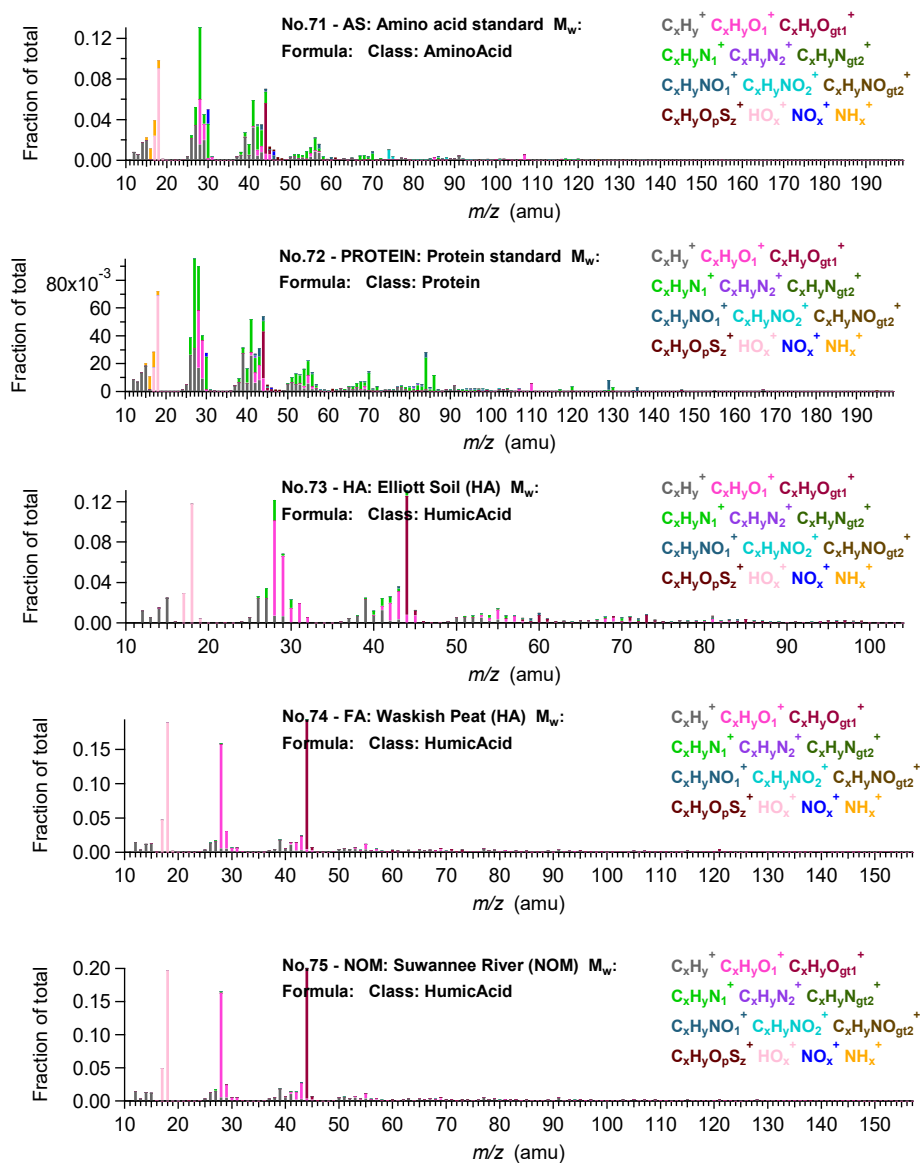

Figure S3. High resolution mass spectra of the 75 ON standards determined in this study.

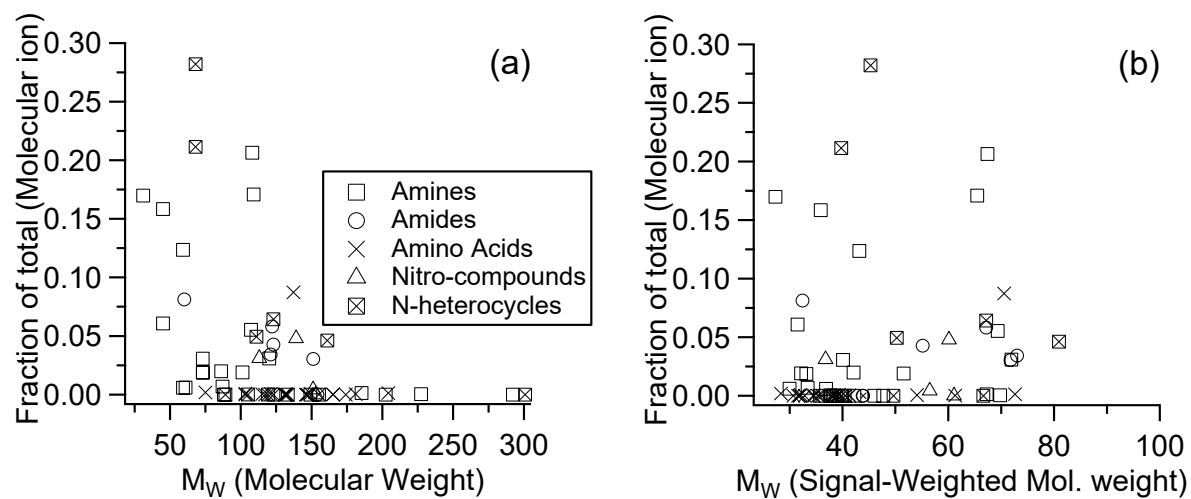

Figure S4. Mass fractions of the molecular ions in the HR-AMS spectra of the ON standards as a function of the molecular weights ( $M_w$ ) (a), and the signal-weighted molecular weights (b) (calculated as  $\sum f_i * i_{m/z}$ , where  $i_{m/z}$  is the exact mass of ion  $i$  and  $f_i$  is the mass fraction of that ion in the compound's spectrum).

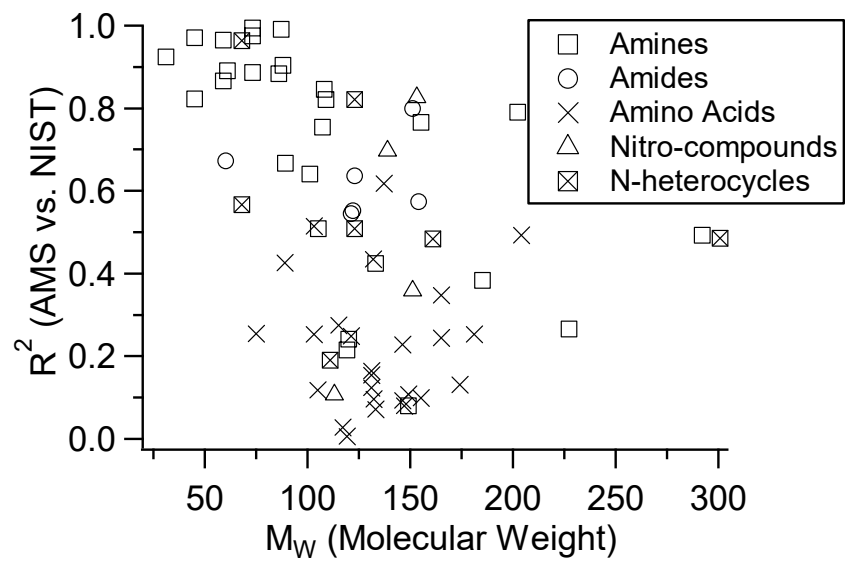

Figure S5. Correlation coefficients (Pearson's  $r^2$ ) between the HR-AMS spectra and the NIST spectra as a function of the molecular weights of the ON standards.

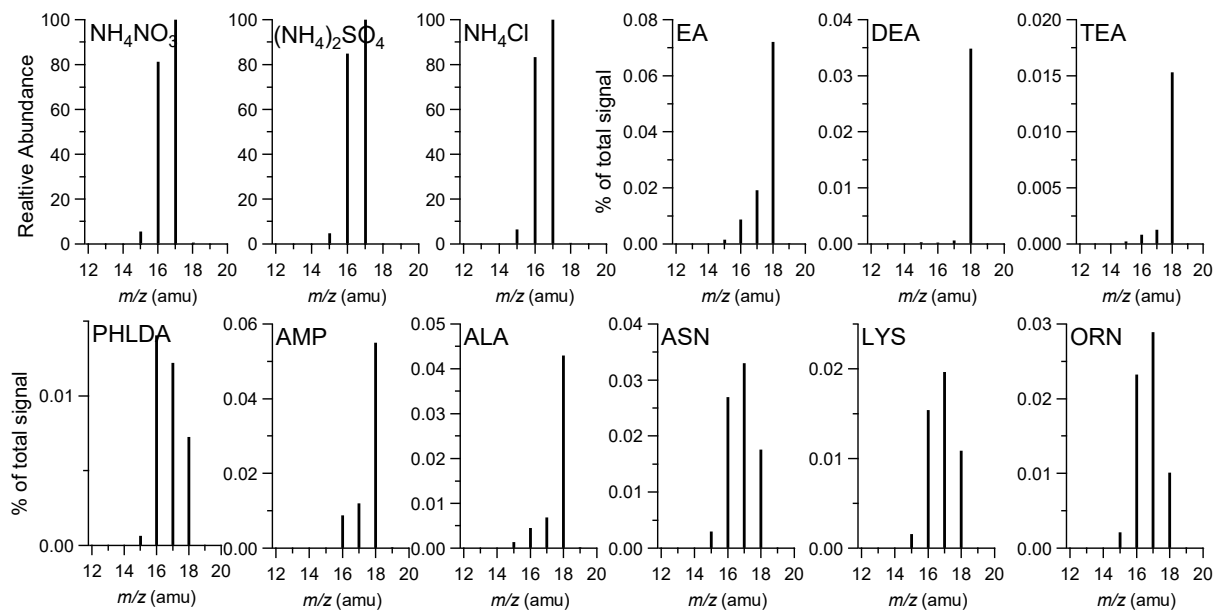

Figure S6. Mass fractional contributions of  $\text{NH}_x^+$  ion fragments in the HR-AMS spectra of ammonium nitrate, ammonium sulfate and ammonium chloride, and a few selected amines and amino acids.

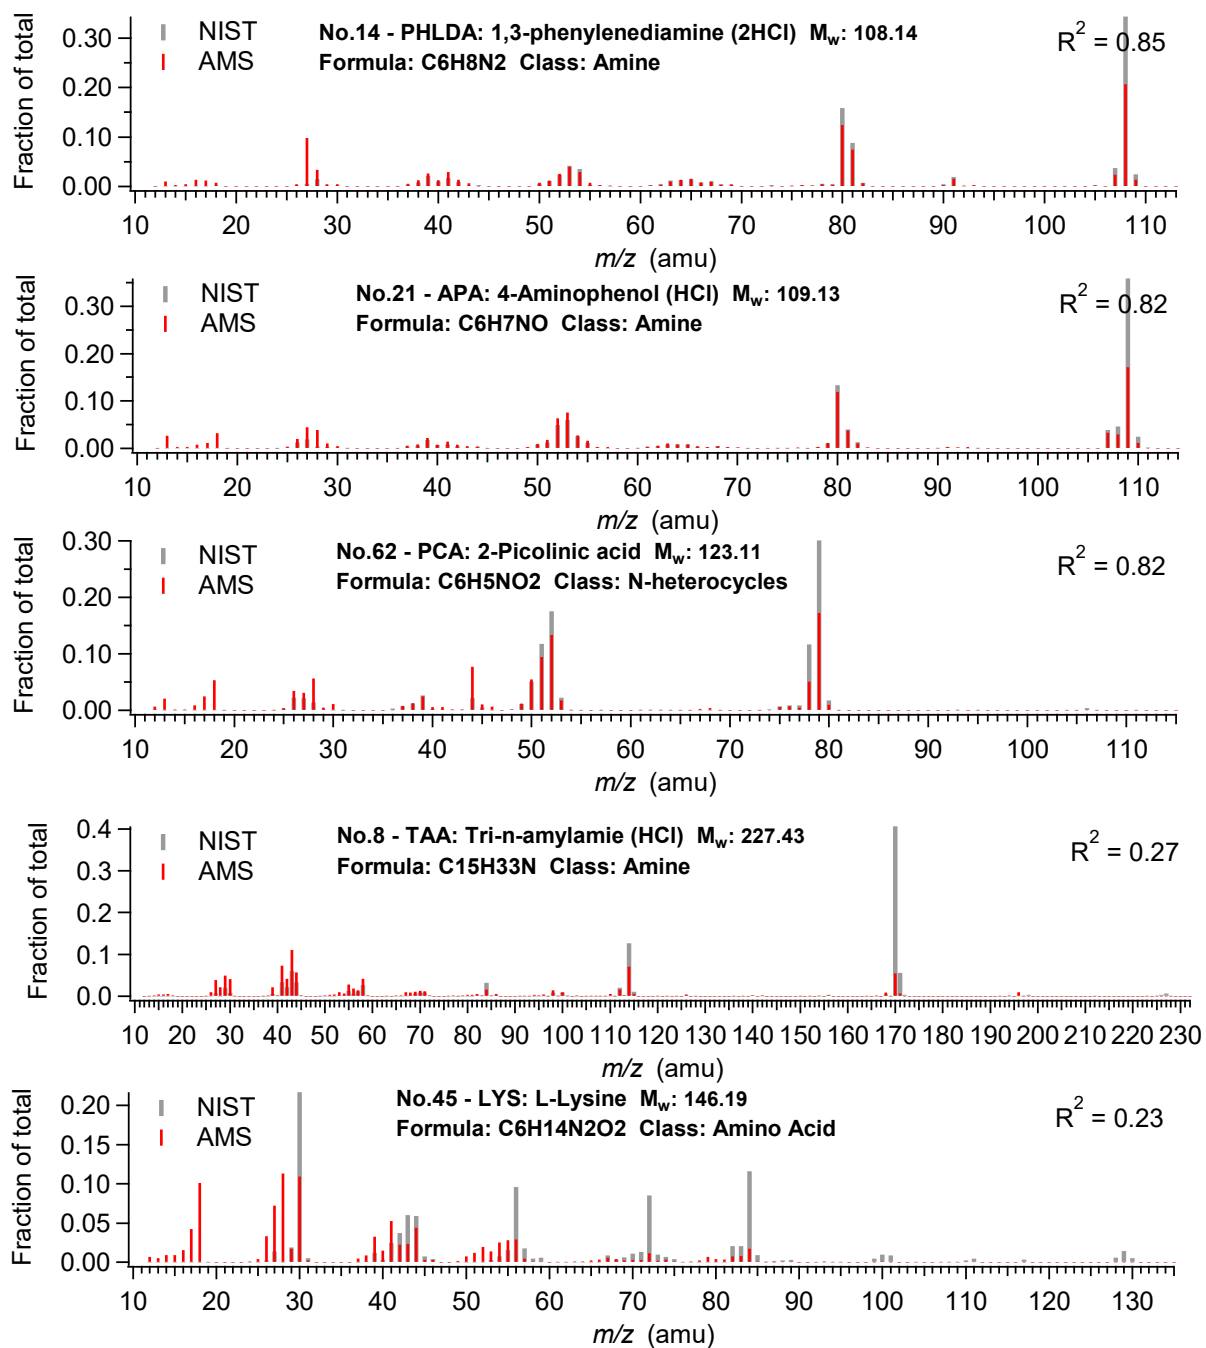

Figure S7. AMS spectra (summed in unit mass resolution from HR spectra) versus NIST spectra for a few selected ON standards.
